# Epidermal threads reveal the origin of hagfish slime

Yu Zeng<sup>1\*</sup>, David Plachetzki<sup>2</sup>, Kristen Nieders<sup>1</sup>, Hannah Campbell<sup>1</sup>,  
Marissa Cartee<sup>2,3</sup>, Kennedy Guillen<sup>1</sup>, and Douglas Fudge<sup>1</sup>

<sup>1</sup>Schmid College of Science and Technology, Chapman University, 1 University Dr., Orange CA 92866

<sup>2</sup>Department of Molecular, Cellular, & Biomedical Sciences, University of New Hampshire

<sup>3</sup>Department of Evolution, Ecology and Organismal Biology, University of California at Riverside

\*Email: [yzeng@chapman.edu](mailto:yzeng@chapman.edu)

## Abstract

Fiber-reinforced soft materials possess high flexibility with high strength but are rare in nature. Hagfishes can produce a tough, fibrous slime within a fraction of a second by ejecting two cellular products, mucus and threads, into seawater. With thousands of silk-like threads, the slime is highly effective in defending against large predators. However, the evolutionary origin of hagfish slime remains unresolved, with the presence of another, putatively homologous thread in the epidermis providing circumstantial evidence for an epidermal origin. Here, we investigated the epidermal threads produced in hagfish skin. We found that these threads average ~2 mm in length and ~0.5  $\mu\text{m}$  in diameter, or ~80 times shorter and ~4 times thinner than the slime threads, characterizing the second longest intracellular fiber. The entire hagfish body is covered by a dense layer of epidermal thread cells, with each square millimeter of skin storing a total of ~96 cm threads. Experimentally induced damage to a hagfish's skin caused the release of threads, which together with mucus, formed an adhesive epidermal slime that is more fibrous and less dilute than the defensive slime. Transcriptome analyses further revealed that the epidermal threads are ancestral to the slime threads, with duplication and diversification of thread genes in parallel with the evolution of slime glands. These results support an epidermal origin of hagfish slime and slime glands, as driven by predator selection for stronger and more voluminous slime.

**Keywords** biomaterial, evolution, morphogenesis, predator-prey interaction, transcriptomics

## 32 1. Introduction

33 Composite materials are produced from two or more constituent materials for improved, novel  
34 performance. Fiber-reinforced soft materials possess special properties (e.g., high viscoelasticity and  
35 flexibility with high strength) and have broad applications, such as medical biomaterials and tissue  
36 engineering (Pan et al., 2007; Gil et al., 2013; O'Brien, 2011). However, there are very few fibrous soft  
37 materials found in nature, partly due to the physical challenge of effective mixing (e.g., the requirement of  
38 turbulence for mixing particles and fibers with fluid; Hishida et al., 1992; Olson, 2001).

39 Among the various defensive structures used by animals, hagfish slime is a fibrous hydrogel,  
40 recognized by its exceptional material properties and unique deployment mechanisms (Ewoldt et al. 2011;  
41 Chaudhary et al. 2018; Lim et al. 2006; Winegard et al. 2010, Bernards et al. 2018). The hagfishes (Class  
42 Myxini) are a group of jawless vertebrates inhabiting the ocean floor as scavengers and predators. A row  
43 of slime glands occurs along each side of a hagfish, with each gland producing and storing gland thread  
44 cells (GTCs) and gland mucous cells (GMCs). When a hagfish is attacked, it produces defensive slime by  
45 rapidly ejecting ruptured GMCs and GTCs into seawater (**Fig. 1A**). Within 400 ms after ejection, coiled  
46 threads from GTCs unravel and mucous vesicles from GMCs swell and deform, resulting in a network of  
47 mucus and threads that entraps large volumes of water and effectively clogs the mouth and gills of fish  
48 predators (Lim et al. 2006; Zintzen et al. 2011).

49 In spite of being composed mostly of water (i.e., > 99.99% seawater), hagfish slime is strong and  
50 viscoelastic (Fudge et al., 2003; Fudge et al., 2005; Ewoldt et al. 2011; Fudge et al., 2015; Böni et al.,  
51 2016). A single pinch on the tail of an adult Pacific hagfish (*Eptatretus stoutii*; ~45 cm body length) can  
52 cause the production of 0.9 liters of slime, which is ~7 times the volume of the animal (~0.14 liters)  
53 (Fudge et al., 2005). There is no other biological or synthetic that can expand so much in so little time,  
54 and there has been no artificial fibrous material that is as dilute and strong as hagfish slime. The  
55 effectiveness of defensive slime may have helped the hagfishes persist through the rise and dominance of  
56 the jawed fishes, while most other jawless vertebrates have gone extinct (Randle and Sansom, 2019).

57 The impressive strength of the slime is imparted by a network of slime threads that, together with  
58 webs of mucus, entrain large volumes of seawater. The threads are proteinaceous fibers, individually  
59 produced and stored within GTCs as a densely packed skein (Downing et al., 1981a,b; Winegard et al.,  
60 2014). Slime threads consist mainly of fibrous  $\alpha$  and  $\gamma$  proteins from the intermediate filament family, and  
61 they rival spider silk in their strength and toughness (Downing et al., 1984; Spitzer et al., 1988; Koch et  
62 al., 1995; Fudge et al., 2003; Fudge and Gosline, 2004; Fudge et al. 2010). A recent study showed that  
63 larger hagfishes produce longer and thicker slime threads, presumably to defend against larger predators.

64 With diameter and length varying four-fold (0.7 – 4  $\mu\text{m}$  and 5 – 22 cm, respectively), hagfish slime  
65 threads are the largest intracellular polymers known in biology (Zeng et al., 2021).

66 The fossil record for hagfishes is sparse, which makes tracing the evolutionary origins of hagfish  
67 slime glands difficult. Available fossil data suggest that slime glands appeared in hagfishes somewhere  
68 between 138 – 365 million years ago (Miyashita, 2020). While the presence of thread-producing cells in  
69 the epidermis of both lampreys and hagfishes suggests an origin of threads in epidermis preceding the  
70 origin of hagfish slime glands (**Fig. 1B**).

71 Anatomical studies of extant hagfishes also suggest that slime glands arose as modifications and  
72 internalizations of the epidermis. An unusual thread-producing cells in hagfish epidermis - epidermal  
73 thread cells (ETCs) – were suspected to be homologous to GTCs in slime glands. Early studies showed  
74 that each ETC produces a single thread loosely packed within the cytoplasm (Schreiner, 1916).  
75 Ultrastructural studies revealed that immature ETC threads consist of a bundle of filaments that are 8 – 14  
76 nm in diameter and resemble cytoplasmic intermediate filaments (Blackstad, 1963). Moreover, unlike  
77 GTCs, ETCs produce a dense mass of granules of unknown function in the distal region of the cell  
78 (Schreiner, 1916). While ETC threads and granules appear to be secretory products, there is no evidence  
79 that ETCs secrete threads or granules via merocrine or apocrine modes (Blackstad, 1963).

80 If the threads produced by ETCs are destined for export, a mechanism that depends on cell  
81 rupture is more likely, and this would be consistent with the holocrine secretion of threads and mucus that  
82 occurs in the slime glands. There is, however, no obvious mechanism of ETC rupture and release, such as  
83 the muscle fibers that surround the slime glands.

84 We thus hypothesized that ETCs rupture and release their contents when the skin is damaged,  
85 especially during interactions with predators. Hagfish skin is flaccid and allows them to survive bites  
86 from sharp-toothed predators such as sharks (Boggett et al., 2017). Although the deployment of slime can  
87 effectively deter these predators, its release is only triggered after the initial attack. Thus, hagfishes are  
88 likely to sustain frequent damage to their skin from predator bites under natural conditions (Zintzen et al.,  
89 2011), and the rupture of epidermal cells may resemble the release of alarm cues during skin damage in  
90 lampreys and many jawed fishes (Pfeiffer and Pletcher, 1964; Bals and Wagner, 2012; Pandey et al.,  
91 2021).

92 To address the function of epidermal threads, we collected morphological and experimental data  
93 from hagfish skin. We first quantified the abundance and morphology of epidermal threads and then  
94 examined the slime product on hagfish skin after experimentally inducing damages. We found the  
95 ruptured epidermal thread cells released threads and granules, forming an adhesive slime that was more

Main Text

96 fibrous and concentrated than the defensive slime. With transcriptomics analysis, we found the thread  
97 biopolymers in hagfish skin are ancestral to those found in slime glands, with gene duplication and  
98 divergence generating a diversity of thread biopolymers uniquely expressed in slime glands. With clear  
99 evidence suggesting an epidermal origin of hagfish slime, we further derived a general model to explain  
100 the initial evolution of hagfish slime glands as driven by predator selection.

101

## 102 **2. Results**

### 103 **2.1 Thread and mucous cells cover the entire hagfish body**

104 Within an epidermal thickness of approximately 95 – 110  $\mu\text{m}$ , epidermal thread cells (ETCs) are  
105 generally found in the basal half ( $\sim 50 \mu\text{m}$  and deeper) of the epidermis, along with large mucus cells  
106 (LMCs). ETCs and LMCs are covered by 3 – 5 layers of small mucus cells (SMCs) (**Fig. 2A**). Viewing  
107 the skin perpendicular to the apical surface (*en face* view), the outer epidermal surface is covered by  
108 densely packed SMCs, while the deeper portion contains mainly ETCs and LMCs (**Movie S1,S2**). To  
109 assess the abundance of ETCs over the entire epidermis, we sampled the density of all three epidermal  
110 cell types from nine transverse cross-sections from head to tail (**SI Fig. S1C-E**). We approximated the  
111 area density of each cell type with respect to skin area as  $\sigma = \lambda^2$ , where  $\lambda$  is the linear density sampled  
112 from the cross-section of skin.

113 We found that the proportion of the three cell types varies little across the different regions  
114 sampled, with ETCs being the second most abundant. The mean area density of ETCs was  $\sim 434 \text{ mm}^{-2}$ .  
115 For an adult hagfish ( $\sim 45 \text{ cm}$  long), we estimate a total of  $\sim 1.2 \times 10^7$  ETCs covering the entire hagfish  
116 body. Notably, this total number of ETCs is  $\sim 3.9$  times greater than the total number of GTCs from all  
117 slime glands combined ( $\sim 3.1 \times 10^6$ , assuming a total of 163 glands; see **SI Appendix A**). In addition, the  
118 LMCs occurred with density  $\sim 92 \text{ mm}^{-2}$ , which is  $\sim 4.7$  times lower than that of ETCs. The SMCs occurred  
119 at a density of  $4.3 \times 10^5 \text{ mm}^{-2}$ , which is  $\sim 1000$  times more abundant than the ETCs. (**SI Fig. S1E,F**).  
120 These abundance data allowed us to approximate the relative proportions of cellular products in epidermal  
121 mucus (see below).

122

### 123 **2.2 Structure of epidermal thread cells**

124 We also examined cross-sections of *E. stoutii* skin using laser scanning confocal microscopy and  
125 identified three prominent structures within ETCs: (1) a densely packed granule cluster, (2) a thread that  
126 is loosely packed along the inner plasma membrane and also interweaves among granules, and (3) a large  
127 nucleus located at the basal surface of the granule cluster (**Fig. 2B**). Such a layout features more  
128 unoccupied cytoplasmic space compared to GTCs, which are mostly occupied by the nucleus and thread  
129 skein across different developmental stages (**SI Fig. S2**). The granule cluster may dominate the cytoplasm  
130 and span across 80% of the apical-basal axis (**Movie S3,S4**). Fluorescence staining with eosin suggests  
131 that the ETC granules are composed of protein, but we have no information about the identity of the  
132 proteins.

### 133 **2.3 Shape and size of epidermal threads**

134 From transmission electron microscopy (TEM) and confocal microscopy, we found three levels of thread  
135 structures: (1) At the nanometer scale, TEM images show parallel filaments that are likely intermediate  
136 filaments, which is consistent with previous results (Blackstad, 1963; see **SI Fig. S3D**). (2) At the  
137 micrometer scale, epidermal threads trace regular right-handed helices. (3) At the sub-cellular scale, the  
138 helical thread is packed in a single layer in a switchback pattern against the inner plasma membrane  
139 surface (**Fig. 2C**; **Movie S4**). At one of its ends, it is interwoven among granules (**SI Fig. S2B**), which  
140 configuration may contribute to the scaffolding function once ETC contents are released (see below).

141 All epidermal threads examined were right-handed helices ( $N = 25$  cells). To understand the  
142 helical geometry of threads, we randomly sampled helix sections with centerline lengths of 5 – 15  $\mu\text{m}$  and  
143 found that the thread diameter ( $\phi$ ) varied between 0.2 – 1.0  $\mu\text{m}$  ( $0.52 \pm 0.18 \mu\text{m}$ ; mean  $\pm$  S.D.). The  
144 helical pitch angle ( $\theta$ ) varied between  $47.6^\circ$  –  $81.8^\circ$  ( $63.5^\circ \pm 5.6^\circ$ ) and was relatively consistent across the  
145 full thread diameter range for a given segment of thread. Similarly, the helical diameter ( $D$ ) varied  
146 between 0.07 – 0.78  $\mu\text{m}$  ( $0.35 \pm 0.10 \mu\text{m}$ ), with a slight reduction with increasing  $\phi$  (**Fig. 2D**). The pitch  
147 angle allowed us to calculate how much the threads can increase in length if the helix is pulled taut. The  
148 extension can be characterized by an extension ratio  $R_{Ext} = 1 - \sin\theta$ , which averaged 10.1% over the  
149 range of pitch angles described above.

150

### 151 **2.4 Epidermal threads versus slime threads**

152 Due to the complex shape of threads, their long aspect ratios, and the difficulty of tracing threads among  
153 granules, we were not able to reconstruct the morphology of an entire thread using confocal microscopy.  
154 We were able, however, to measure the full length of threads we collected by scraping hagfish skin with a  
155 cover glass. Thread length  $L_T$  from these measurements was  $2.2 \pm 0.54$  mm (mean  $\pm$  S.D.; **SI Fig.**  
156 **S3A,B**). These isolated threads were generally straight and showed little evidence of the helical  
157 morphology seen in intact ETCs. Incorporating the helical pitch angle  $\theta$  above, we can approximate the  
158 total length of the helical centerline as  $L'_T = L_T \sin \theta = 2.68 \pm 0.13$  mm, which is  $\sim 53$  times longer than  
159 the cell's major axis ( $\sim 50 \mu\text{m}$ ). Overall, the epidermal threads are  $\sim 80$  times shorter and  $\sim 4$  times thinner  
160 than slime threads, making them one of the largest intracellular fibers known (**Fig. 3B**). Some epidermal  
161 threads appeared to cleave into multiple sub-threads after being stretched, implying loose inter-filament  
162 binding (**Fig. 3C**; **SI Fig. S3C**).

163 Assuming threads are cylindrical and ETCs are ellipsoidal, the volume fraction occupied by  
164 threads within ETCs can be approximated as

$$\frac{V_T}{V_{ETC}} = \frac{\pi r_T^2 L_T}{\frac{4}{3} \pi r_a r_b^2} \quad (1)$$

Using the ranges of thread radius ( $r_T = 0.5\phi$ ), thread length  $L_T$  and mean cell dimensions (major axis  $r_a \sim 27 \mu\text{m}$ ; minor axis  $r_b \sim 23 \mu\text{m}$ ; see **SI Fig. S2**), we found the epidermal threads only occupy 1.4% – 5.8% of the cytoplasmic space, which is much lower than the GTCs, where thread skeins may occupy > 95% of the cytoplasmic space (Downing et al., 1981; Zeng et al., 2021). To assess the thread storing capacity of the skin, we combined the stored thread length and area density of ETCs to calculate the area density of threads:  $\sigma_T = \sigma_{ETC} L_T$ , which yields a total of  $\sim 96$  cm threads per square millimeter of skin.

## 2.5 Damaged skin produces a fibrous slime

Dragging a sharp pin across a hagfish's skin resulted in the formation and accumulation of a thick epidermal slime (translational speed  $\sim 17$  cm/s; mean vertical force 0.06 N, pressure  $\sim 2$  MPa, assuming a contact area of  $0.03 \text{ mm}^2$ ; **Fig. 4A,B**; **Movie S5**). Examining the path of the pin on the skin with scanning electron microscopy (SEM) revealed evidence that scraping caused rupture of ETCs and release of granules and threads. In relatively shallow wounds, where only the apical portions of ETCs were removed, the granule-thread complex was typically found anchored with the basal portion of threads to the inner surface of the cell's plasma membrane (**Fig. 4C**).

Epidermal slime appeared as a white material that adhered to the scraping object, exhibiting properties distinct from the defensive slime (**Movie S5,S6**). Examination of the slime with light microscopy and SEM confirmed the presence of granules and threads, along with threads aligned with the scraping direction (**Fig. 4E**; **SI Fig. S4-S5**). Released granule-thread complexes were observed on the edge of coverslips used for scraping or on the skin surface after scraping, and often were seen with a single thread trailing from a granule cluster (**SI Fig. S3E-G**). Although we saw no direct evidence of LMC cell products, given their position in the same basal layer of the epidermis, it is likely that LMCs rupture under the same conditions that cause ETC rupture and contribute to the mucus components of epidermal slime.

## 2.6 Epidermal slime versus defensive slime

Scraping with the edge of a cover glass over  $18 \text{ cm}^2$  of skin that had been blotted dry led to about 2 – 10 mg ( $5.2 \pm 2.4$  mg; mean  $\pm$  S.D.) of slime adhered to the coverslip, which is equivalent to a productivity of

195 ~0.3 mg/cm<sup>2</sup>. The relative water content of epidermal slime sampled from skin immersed in seawater  
196 ranged from 92% – 96% (93.9% ± 1.2%; mean ± S.D.) and from 70% – 90% (74.7% ± 6.8%) for samples  
197 collected from dried skin (**Fig. 4D**).

198 Both epidermal slime and defensive slime are structurally heterogeneous, containing long threads  
199 and mucus. Here, we use the ratio between the total thread length and the total slime volume to  
200 characterize the level of ‘fibrosity’ of the two types of slime. The fibrosity index of epidermal slime was  
201 calculated as:

$$r_F = \frac{L_T}{V_S} \quad (2)$$

204 where  $L_T$  is the total length of thread and  $V_S$  is the volume of slime. Specifically,  $L_T$  was calculated as the  
205 product between the mean length of a single thread  $L'_T$  and the number of ETCs:  $L_T = L'_T N_{ETC}$ .

206 Considering an ideal situation without swelling with seawater, the volume of slime should equal  
207 to the total volume of ruptured epidermal cells. With a unit skin area  $A$  and the mean thickness of  
208 epidermis  $D_{epi} = 100 \mu\text{m}$ , we have  $V_{S(Unswollen)} = AD_{epi}$  and  $N_{ETC} = \sigma_{ETC}A$ . Thus, Eqn. (2) can be  
209 expressed as:

$$r_{F(Unswollen)} = \frac{L'_T \sigma_{ETC}}{D_{epi}} \quad (3)$$

212 Incorporating single thread length ( $L'_T = 2.2 \text{ mm}$ ) and area density of ETC ( $\sigma_{ETC} = 434 \text{ mm}^{-2}$ ), we found  
213  $r_{F(Unswollen)} \approx 9600 \text{ mm/mm}^3$  for epidermal slime without swelling with seawater. Next, acknowledging  
214 that swollen slime has ~19% more water than unswollen slime and assuming the density of unswollen  
215 slime is close to that of seawater, we derived  $V_{S(Swollen)} = 1.19V_{S(Unswollen)}$  and approximated  
216  $r_{F(Swollen)} \approx 8024 \text{ mm/mm}^3$  for swollen epidermal slime, which is ~686 times higher than that of the  
217 defensive slime (~12 mm/mm<sup>3</sup>; based on Schorno et al., 2018; see **SI Appendix B**). Together, these  
218 results show that epidermal slime is less dilute and much more fibrous than defensive slime (**Fig. 4F,G**).

219

## 220 **2.7 Epidermal threads are ancestral to slime threads**

221 We examined the transcriptomes of skin and slime glands. Two types of thread proteins,  $\alpha$  and  $\gamma$ , were  
222 previously identified (Koch et al. 1994; 1995) and threads produced from these genes were hypothesized



223 to comprise the fibrous slime of hagfish. We characterized  $\alpha$  and  $\gamma$  thread transcripts from replicate  
224 RNAseq datasets from skin and slime gland tissues of *E. goslinei*, a close relative of *E. stoutii*.

225 We identified a single, highly expressed  $\alpha$  thread biopolymer transcript in the epidermis that  
226 likely comprises the epidermal threads (**Fig. 5**). We also uncovered a monophyletic diversity of highly  
227 expressed slime gland-specific  $\alpha$  transcripts, suggesting that rampant gene duplication of GTC-specific  $\alpha$   
228 thread genes may underpin some of the exotic biophysical properties of hagfish slime. In addition,  $\gamma$   
229 thread biopolymer transcripts in slime glands were more diverse than previously described and were only  
230 present in slime glands. The presence of well characterized, skin-specific  $\alpha$  thread orthologs from both  
231 lamprey and teleosts indicates that a gene duplication of a skin-expressed  $\alpha$  locus gave rise to a radiation  
232 of slime gland-specific  $\alpha$  transcripts, while all  $\gamma$  biopolymer transcripts uniquely expressed in slime gland  
233 were secondarily derived.

234

235

### 236 **3. Discussion**

237 Our results demonstrated the epidermal threads are released through cell rupture during skin damage,  
238 together with mucus, forming a fibrous epidermal slime. With the ETC granules possibly serving anti-  
239 predator, antimicrobial or alarm functions (see **SI Appendix C**), the epidermal slime can be produced  
240 during interactions with predators and likely represent an incipient form of the defensive slime. Also,  
241 gene expression data provided support for an epidermal origin of slime glands. Below, we discuss the  
242 structure and function of epidermal threads and propose a simplified model to explain the origins of  
243 hagfish slime glands and defensive slime.

244

#### 245 **3.1 Structure and function of epidermal threads**

246 Like slime threads, epidermal threads appeared to be mechanically robust, with no evidence of threads  
247 breaking even when they were sheared under a cover glass. The lack of helical twists in the elongated  
248 threads suggests that the threads are capable of plastic deformation, a property that has also been observed  
249 in slime threads and individual intermediate filaments (Fudge et al. 2003; Kreplak et al. 2005). Notably,  
250 the appearance of loose subfilament structure in some epidermal threads (**Fig. 3C**; **SI Fig. S3C**) has not  
251 been observed in slime threads. This suggests that epidermal threads may simply be a bundle of  
252 individual intermediate filaments. In contrast, intermediate filaments in slime threads undergo a phase  
253 transition in which filaments condense with their neighbors to form a single, solid thread (Winegard et al.  
254 2014; Terakado et al., 1975; Downing et al., 1984).

255 The production of a macroscopic thread that is released after cell rupture suggests an evolutionary  
256 affinity between ETCs and GTCs and provides support for an epidermal origin of slime glands. If GTCs  
257 were derived from a primitive form of ETCs, selection for greater thread length and strength (and  
258 therefore diameter; **Fig. 3B**) were likely important for the transition from ETC to GTC. Selection for  
259 larger threads within the confined limits of the cytoplasm was also likely responsible for the evolution of  
260 a tightly packed thread skein and the loss of granules in GTCs (see Zeng et al., 2021). Hagfish GTCs and  
261 ETCs, along with lamprey skein cells (Land and Whitear, 1980), are the only epidermal cells capable of  
262 producing the largest intracellular fibers (**Fig. 3B**), and they likely share a single evolutionary origin.

263 Our results show that epidermal threads associate with mucus to form a fibrous epidermal slime,  
264 which may be the evolutionary precursor of defensive slime (see below). While the length of individual  
265 epidermal threads is small compared to slime threads, the large number of ETCs in the epidermis  
266 represents a significant reserve of thread length. For example, the total length of epidermal threads  
267 produced by  $\sim 1.1\%$  of the skin area of an adult hagfish ( $\sim 3.15 \text{ cm}^2$ ) equals the total length of slime

268 threads ejected from a single slime gland (~2736 m) (see **SI Table S2**). These numbers demonstrate that a  
269 version of the most complex part of hagfish slime – the threads – was likely being produced in large  
270 quantities in the skin long before the slime glands appeared.

271

### 272 **3.2 Mechanism of epidermal slime formation**

273 Our mechanical abrasion experiments demonstrated the formation of a thick epidermal slime, which  
274 shared similar structural components with the defensive slime (**Fig. 6A**). Epidermal threads not only  
275 appeared to hold the slime together, but they were also readily caught on and adhered to the hard  
276 structures we used to damage hagfish skin (i.e., pin, coverslip and sandpaper; **Fig. 4; SI Fig. S5**). Under  
277 natural conditions, this property of the epidermal slime may allow it to adhere to a predator's teeth after it  
278 has bitten a hagfish. Once bound to the predator's teeth, the epidermal slime may deliver distasteful  
279 compounds to discourage further bites. It is also possible that the slime remains adhered to the hagfish's  
280 skin after an attack (see **SI Fig. S4**), which would be consistent with an antimicrobial function of ETC  
281 granules, with compounds in the granules inhibiting bacterial growth at the wound site. Both the  
282 distasteful and antimicrobial hypotheses of epidermal slime function should be tested with further  
283 experiments.

284

### 285 **3.3 Thread proteins in skin and slime glands**

286 Our transcriptomic analyses suggest that slime threads are evolved from epidermal threads, with  
287 duplication and diversification of skin-specific  $\alpha$  genes and new expression of  $\gamma$  thread genes in slime  
288 glands (**Fig. 5**). If epidermal threads consist of bundled intermediate filaments made primarily of  $\alpha$  thread  
289 proteins, this suggests that  $\alpha$  proteins in the skin behave more like homopolymeric Type III intermediate  
290 filaments, whereas those in the slime glands are more similar to the heteropolymeric keratins (Type I/II).  
291 If true, this transition from a homopolymeric to a heteropolymeric intermediate filament may provide  
292 deep insights into how the keratin intermediate filaments may have arisen from homopolymeric ancestral  
293 proteins. It also reconciles the seemingly contradictory findings of Koch et al. (1994, 1995) and Schaffeld  
294 & Schultess (2006) who found similarities to Type I/II and Type III intermediate filaments, respectively.

295 To reduce heterozygosity, comparative transcriptome analyses were conducted using data from a  
296 single *E. goslonei* individual (Mincarone et al. 2021). In addition, we filtered our phylogenetic analyses of  
297 transcripts to include only approximately full-length sequences that had expression levels above TPM >  
298 10 for replicate RNAseq datasets. Because of this, the diversity of thread transcripts identified from a  
299 single *E. goslonei* individual could correspond to prominently expressed loci, alleles, splice-products, and

300 combinations therein. We screened publicly available coding sequence data from *E. burgeri* but did not  
301 detect sequences with homology to either  $\alpha$  or  $\gamma$ . The lack of  $\alpha$  and  $\gamma$  sequences in the *E. burgeri* genome  
302 may be a consequence of chromosome elimination, which has been shown to be prevalent in hagfishes  
303 (Nakai et al., 1995). While questions on the genetics of the  $\alpha$  and  $\gamma$  thread diversity will become clear  
304 once more complete genomic resources for hagfish become available, the starkness of the expression  
305 differences between  $\alpha$  and  $\gamma$  transcripts is notable. While we had no criteria that transcripts be  
306 differentially expressed between skin and slime gland for inclusion in our analysis, all  $\alpha$  and  $\gamma$  transcripts  
307 that met the above criteria were significantly differentially expressed.

308

### 309 **3.4 Implications for the origin of hagfish slime**

310 The morphological, functional, and genetic evidence laid out above all point to an epidermal origin of  
311 hagfish slime glands. Below, we list some of the changes that had to occur to transform the epidermis into  
312 slime glands and we discuss the selective scenarios underlying those changes.

313 If one considers the origin of slime glands from a cellular perspective, there were several changes  
314 that had to occur, from the cellular composition and organization of the tissues, as well as changes to the  
315 cell themselves. Slime glands contain two main secretory cell types - GTCs and GMCs - and these most  
316 likely arose via modifications of ETCs and LMCs, respectively. For the transition from GTCs to ETCs, in  
317 addition to the increase in cell size (i.e., GTCs are ~40 times larger than ETCs in volume) and thread  
318 packing due to selection for larger thread size (Zeng et al. 2021), some of the differences in thread  
319 properties may be related to the differences in thread protein composition that our transcriptome data  
320 point to, with slime glands expressing several  $\alpha$  and  $\gamma$  transcripts and skin only expressing a single  $\alpha$   
321 transcript. While SMCs are the most common cell type in the epidermis, there is no corresponding cell  
322 type in the slime gland. The exclusion of SMC in slime glands probably has to do with its function of  
323 constitutively secreting mucus as a protective barrier at the outer surface of skin (Patzner et al., 1982).  
324 During the evolution of slime glands through possible invagination of the epidermis, cells specialized for  
325 slow release of mucus had little purpose and were likely excluded in favor of larger proportions of ETCs  
326 and LMCs (see below).

327 In addition to changes in cellular composition and the nature of the cells themselves, slime gland  
328 tissue differs markedly from epidermis, with the most obvious differences being their size, shape, and  
329 association with striated muscle. Slime glands are approximately ellipsoidal and typically 2-3 mm in  
330 diameter, whereas hagfish epidermis has a thickness of only about 100  $\mu$ m. Thus, the production of slime  
331 glands from epidermis involved a local expansion of the epidermis, which was presumably driven by an  
332 initial selection for a greater capacity to produce mucus and threads (**Fig. 6B**). Expansion, and possibly

333 invagination of the epidermis allowed for increased production and storage of secretory cells, but also  
334 created a new challenge of how to effectively deploy the secretory products. A selection for rapid release  
335 of a large number of thread and mucous cells (see also below) likely has fostered the acquisition of  
336 striated muscle fibers (i.e., the *musculus decussatus*) that surround the gland capsule. The muscle-  
337 powered ejection of gland cells allows hagfishes to produce large volumes of defensive slime at specific  
338 locations along their body in a few hundred milliseconds.

339         Our demonstration of the epidermal slime produced by damaged skin provides a possible starting  
340 point for addressing the initial selective scenarios underlying the origin of slime glands. We propose that  
341 hagfish epidermal slime arose as an immediate defense against predators, with distasteful granules  
342 released from ETCs acting to discourage further attacks. Under this scenario, epidermal threads may have  
343 arisen as a way of keeping the granules from dispersing too quickly after cell rupture. If this strategy was  
344 effective, selection may have favored an increased capacity to produce granules, threads, and mucus  
345 during attacks. At some point, the volume of released slime was enough for it to have other effects, most  
346 notably an ability to stick to the mouth and gills of fish predators due to the presence of the threads. We  
347 propose that it was this shift that ultimately led to the divergence of epidermis and slime glands, with  
348 threads in the former becoming specialized for binding granules and epidermal slime and threads in the  
349 latter specialized for clogging gills in association with mucus and seawater.

350

351

## 352 **4. Materials and methods**

### 353 **4.1 Animal care and euthanasia**

354 Wild-captured Pacific Hagfishes (*E. stoutii*) were housed in a 1000-liter tank of chilled artificial seawater  
355 (34‰, 8°C) at Chapman University, CA, USA. Hagfish were anesthetized using clove oil (200 mg/L)  
356 (McCord et al. 2020). For euthanasia, hagfish were first anesthetized in 200 mg/L of clove oil and then  
357 transferred to a lethal dose of MS-222 (250 mg/L).

358

### 359 **4.2 Abundance of epidermal thread cells**

360 To quantify the abundance of ETCs and the other two epidermal cells, we sampled cell densities using  
361 fixed and stained samples of hagfish skin. First, with a series of transverse cross-sections, we sampled cell  
362 abundance along the skin circumference. One Pacific hagfish (body length ~45cm) was fixed with 3%  
363 PBS-buffered paraformaldehyde, and then divided into 10 sections of equal length, exposing 9 transverse  
364 cross-sections. Of each cross-section, the anterior portion (~1 cm thickness) was embedded in paraffin  
365 wax, sectioned (20 µm thick) and transferred to slides (**SI Fig. S1C**). The tissues were then stained with  
366 hematoxylin and eosin (H&E) following standard procedures (Bancroft and Gamble, 2008) and mounted  
367 with Permount Mounting Medium (Fisher SP15-100). Digital images were taken for the entire skin  
368 section using transmitted light microscopy (40× objective, Zeiss Axio Imager 2).

369 For each cross-section, the anteroposterior position ( $P_{AP}$ ) was defined as the relative distance from the  
370 snout (**SI Fig. S1C**). Next, we traced the profile of epidermis for one arbitrary side using ImageJ (Rueden  
371 et al., 2017). The dorsoventral position ( $P_{DV}$ ) was defined as the relative distance from the dorsalmost  
372 point ( $P_{DV}=0$ ; at the dorsal ridge). We then sampled sections of ~1 mm long at each of dorsalmost,  
373 ventralmost and lateral positions. The dorsoventral position of each section was calculated as  $P_{DV}=(P_b-$   
374  $P_a)/2$ , where  $P_a$  and  $P_b$  are dorsoventral positions of the two ends (**SI Fig. S1C**). Within each section, we  
375 manually recorded the number of cells ( $N_{cell}$ ) and calculated the linear density as  $\lambda = N_{cell}/L_{section}$ ,  
376 where  $L_{section} = P_b - P_a$  is the section length. Analyses were performed using custom-written scripts in  
377 R (R Core Team, 2013).

378 Second, we sampled the area density ( $\sigma$ ) of cells in 2 freshly euthanized hagfishes. From each  
379 hagfish, we collected skin samples (2×2 mm) from the lateral region at three anteroposterior positions  
380 (0.2, 0.5, and 0.8). Each skin sample was immediately fixed with 3% PBS-buffered paraformaldehyde (30  
381 min), stained with eosin (~2 min) and washed with 75% ethanol. The skin sample was then transferred to

382 a large coverslip (24×50 mm) with the epidermis facing downward and covered by a smaller coverslip  
383 (24×40 mm). Images stacks were then taken with an inverted confocal microscope (Zeiss LSM 980).

384

### 385 **4.3 Morphometrics of ETCs and contents**

386 We took image stacks for ETCs on H&E stained slides using laser confocal microscopy (Zeiss LSM 980  
387 with Airyscan). We sampled the size and area density of granules from cross-sectional confocal images of  
388 17 ETCs. With each cross-section, we manually counted the number of granules and digitized the profile  
389 of the granule cluster. We then calculated the area density as  $\sigma = N/A$ , where  $N$  is number of granules  
390 and  $A$  is cross-sectional area of the cluster.

391 We further sampled granules from confocal image stacks taken in the axial direction to assess the  
392 variation of granule size. On each slice, we approximated each granule as an ellipse by fitting it with the  
393 ‘oval’ tool in ImageJ. We then summarized the size and density of granules with respect to the axial  
394 position (as represented by z-direction) using custom-written R scripts.

395

### 396 **4.4 Size and shape of epidermal threads**

397 The helical geometry of threads was sampled from confocal image stacks using ImageJ. We chose helix  
398 sections that revolved about an approximately straight central axis for at least 3 consecutive helical loops.  
399 We also checked the thread appearance between stacks to make sure it was approximately aligned with  
400 the image plane. We placed paired landmarks on the peaks and valleys on each side of the thread section  
401 (SI Fig. S2C). Later, with custom-written R scripts, we calculated the centerline of each helix as  $p_c = \langle$   
402  $p_i + p_j \rangle$ , where  $p_i$  and  $p_j$  denote points on each bilateral side of the thread and angle brackets denote  
403 average. The mean direction of increase was represented by a vector  $v_{inc} = \overline{p_c}$ . The thread diameter ( $\phi$ )  
404 was calculated as  $\phi = |p_i - p_j|$  for each pair of landmarks and the mean diameter was calculated for each  
405 helix. The pitch angle ( $\theta$ ) was calculated for each half loop as the angle between the centerline and the  
406 normal direction of the mean direction of increase. Correspondingly, the helical radius ( $r$ ) was calculated  
407 as  $2r = p/\tan\theta$ , where  $p$  is the helical pitch angle (Fig. 2D).

408

### 409 **4.5 Epidermis wounds**

410 We examined the products of epidermal abrasion caused by frictional contact and laceration caused by  
411 sharp surfaces. To simulate the frictional contact with epidermis and collect the products, we scraped the  
412 epidermis of anesthetized hagfishes using a glass coverslip (18×18 mm). In each trial, we oriented the

413 coverslip at a  $\sim 45^\circ$  contact angle to the hagfish skin and scraped along the lateral side for a linear distance  
414 of  $< 5$  cm. Next, the coverslip was carefully placed onto a glass slide (**SI Fig. S3E**). The samples were  
415 then observed with an upright compound microscope using transmitted light and DIC optics (Zeiss Axio  
416 Imager 2) and images were captured with a digital camera (Axiocam 506;  $2752 \times 2208$  pixels). For free  
417 threads, we took individual images with  $20\times$  or  $40\times$  objective lenses and later stitched them using Adobe  
418 Photoshop.

419 To observe wounded epidermis, we introduced shallow wounds with a scalpel on euthanized  
420 hagfishes. We then excised a  $2\times 2$  mm skin sample and placed each on a large coverslip ( $24\times 50$  mm) with  
421 the epidermis facing down. The samples were fixed with 4% PBS-buffered paraformaldehyde ( $\sim 20$  min),  
422 stained with eosin ( $\sim 5$  min) and washed with 75% ethanol. To minimize disruption, the samples were  
423 maintained on the coverslip throughout the staining process. We washed the samples by slightly tilting  
424 the coverslip and dropping 75% ethanol from the higher end, with paper towel collecting the liquid at the  
425 bottom. We then took images of the samples using confocal microscopy (Zeiss LSM 980 with Airyscan).

426

#### 427 **4.6 Phylogenetic and comparative transcriptome analyses**

428 Transcriptome assemblies were constructed using Trinity (Grabherr et al., 2011) using RNAseq datasets  
429 from three replicates of skin and slime gland tissues for *E. goslinei*. Resulting assemblies were filtered  
430 using cd-hit and a  $-c 0.98$  parameter setting. Reduced transcriptome assemblies were then translated to  
431 protein sequences using Transdecoder (Grabherr et al., 2011). Concurrently, reads from the replicate  
432 RNAseq datasets were mapped onto the assemblies using Salmon (Patro et al., 2017) and differential gene  
433 expression analyses were conducted using the Fisher's Exact test implemented in EdgeR (Robinson et al.,  
434 2010) with  $P$ -value cutoff of 0.05.

435 Database searching and phylogenetic analyses were conducted using the following approach.  
436 First, a BLAST (Altschul et al., 1990) database was prepared that included protein models from the  
437 genomes of *Petromyzon marinus*, *Callorhinchus milli*, and *Danio rerio*, and the translated protein models  
438 derived from the *E. goslinei* transcriptome assembly. BLAST (Altschul et al., 1990) was conducted using  
439  $\alpha$  and  $\gamma$  thread sequences (Koch et al., 1995) as queries in separate analyses using a low stringency  $e$  value  
440 of 0.0001 while retaining up to 30 sequences per species. The resulting sequences were aligned using  
441 MAFFT (Kato and Standley, 2013) and the  $-\text{auto}$  setting and the first round of phylogenetic analyses  
442 were conducted under the best fit model in IQ-TREE (Nguyen et al., 2015), which in both cases was  
443 LG+I+G+F. The resulting topologies, after rooting with a distant intermediate filament outgroup,  
444 contained many additional, more distantly related intermediate filament proteins in addition to the  $\alpha$  and  $\gamma$



445 thread clades. Next, in separate phylogenetic analyses of  $\alpha$  and  $\gamma$  sequences, approximately full-length  
446 sequences that had an expression of transcripts per million (TPM) > 10 were retained as were any non-  
447 hagfish sequences that may have been present. Finally, in separate procedures  $\alpha$  and  $\gamma$  sequences were  
448 realigned and analyzed phylogenetically under the best fit model (LG+I+G+F) resulting in the gene trees  
449 shown in **SI Fig. S6**. Bioinformatic and statistical code is available at  
450 [https://github.com/plachetzki/ETC\\_GTC](https://github.com/plachetzki/ETC_GTC). Raw RNAseq data are available under BioProject  
451 PRJNA497829.

452

453

#### 454 **Acknowledgements**

455 We thank Andrew Lowe for logistical help and thank Richard Wassersug for comments. This study was  
456 supported by NSF grants IOS-1755397 to D.F. and IOS-1755337 to D.P.

457

#### 458 **Author contributions**

459 Y. Z., K. N., H. C., and D. F. devised experiments. Y. Z., K. N., H. C. and K. G. collected and analyzed  
460 morphological and experimental data. D.P. and M. C. conducted the molecular and phylogenetic analyses.  
461 Y.Z., D.F., and D.P. all contributed to writing the manuscript.

462

#### 463 **Declaration of interests**

464 The authors declare no competing interests.

465

## 466 **References**

- 467 **Altschul, S. F., Gish, W., Miller, W., Myers, E. W. and Lipman, D. J.** (1990). Basic local alignment search tool.  
468 *Journal of Molecular Biology* **215**, 403-410.
- 469 **Bals, J. D. and Wagner, C. M.** (2012). Behavioral responses of sea lamprey (*Petromyzon marinus*) to a putative  
470 alarm cue derived from conspecific and heterospecific sources. *Behaviour* **149**, 901-923.
- 471 **Bancroft, J. D. and Gamble, M.** (2008). *Theory and practice of histological techniques*, Elsevier health sciences.
- 472 **Bernards Jr, M. A., Schorno, S., McKenzie, E., Winegard, T. M., Oke, I., Plachetzki, D. and Fudge, D. S.**  
473 (2018). Unraveling inter-species differences in hagfish slime skein deployment. *Journal of Experimental Biology*  
474 **221**, jeb176925.
- 475 **Blackstad, T. W.** (1963). The skin and the slime glands. *The Biology of Myxine*, 195-230.
- 476 **Boggett, S., Stiles, J. -L., Summers, A. P. and Fudge, D. S.** (2017). Flaccid skin protects hagfishes from shark  
477 bites. *Journal of The Royal Society Interface* **14**, 20170765.
- 478 **Böni, L., Fischer, P., Böcker, L., Kuster, S. and Rühs, P. A.** (2016). Hagfish slime and mucin flow properties and  
479 their implications for defense. *Scientific Reports* **6**, 1-8.
- 480 **Chaudhary, G., Fudge, D. S., Macias-Rodriguez, B. and Ewoldt, R. H.** (2018). Concentration-independent  
481 mechanics and structure of hagfish slime. *Acta biomaterialia* **79**, 123-134.
- 482 **Downing, S. W., Salo, W. L., Spitzer, R. H. and Koch, E. A.** (1981a). The hagfish slime gland: a model system  
483 for studying the biology of mucus. *Science* **214**, 1143-1145.
- 484 **Downing, S. W., Spitzer, R. H., Koch, E. A. and Salo, W. L.** (1984). The hagfish slime gland thread cell. I. A  
485 unique cellular system for the study of intermediate filaments and intermediate filament-microtubule interactions.  
486 *The Journal of cell biology* **98**, 653-669.
- 487 **Downing, S. W., Spitzer, R. H., Salo, W. L., Downing, J. S., Sidel, L. J. and Koch, E. A.** (1981b). Threads in  
488 the hagfish slime gland thread cells: organization, biochemical features, and length. *Science* **212**, 326-328.
- 489 **Ewoldt, R. H., Winegard, T. M. and Fudge, D. S.** (2011). Non-linear viscoelasticity of hagfish slime.  
490 *International Journal of Non-Linear Mechanics* **46**, 627-636.
- 491 **Fudge, D. S., Gardner, K. H., Forsyth, V. T., Riekel, C. and Gosline, J. M.** (2003). The mechanical properties of  
492 hydrated intermediate filaments: insights from hagfish slime threads. *Biophysical Journal* **85**, 2015-2027.
- 493 **Fudge, D. S., Hillis, S., Levy, N. and Gosline, J. M.** (2010). Hagfish slime threads as a biomimetic model for high  
494 performance protein fibres. *Bioinspiration & Biomimetics* **5**, 035002.
- 495 **Fudge, D. S., Levy, N., Chiu, S. and Gosline, J. M.** (2005). Composition, morphology and mechanics of hagfish  
496 slime. *Journal of Experimental Biology* **208**, 4613-4625.
- 497 **Fudge, D. S., Schorno, S. and Ferraro, S.** (2015). Physiology, biomechanics, and biomimetics of hagfish slime.  
498 *Annual Review of Biochemistry* **84**, 947-967.
- 499 **Fudge, D. S. and Gosline, J. M.** (2004). Molecular design of the  $\alpha$ -keratin composite: Insights from a matrix--free  
500 model, hagfish slime threads. *Proceedings of the Royal Society of London. Series B: Biological Sciences* **271**, 291-  
501 299.
- 502 **Gil, E. S., Panilaitis, B., Bellas, E. and Kaplan, D. L.** (2013). Functionalized silk biomaterials for wound healing.  
503 *Advanced healthcare materials* **2**, 206-217.

- 504 **Grabherr, M. G., Haas, B. J., Yassour, M., Levin, J. Z., Thompson, D. A., Amit, I., Adiconis, X., Fan, L.,**  
505 **Raychowdhury, R. and Zeng, Q.** (2011). Trinity: reconstructing a full-length transcriptome without a genome from  
506 RNA-Seq data. *Nature biotechnology* **29**, 644.
- 507 **Hishida, K., Ando, A. and Maeda, M.** (1992). Experiments on particle dispersion in a turbulent mixing layer.  
508 *International Journal of Multiphase Flow* **18**, 181-194.
- 509 **Katoh, K. and Standley, D. M.** (2013). MAFFT multiple sequence alignment software version 7: improvements in  
510 performance and usability. *Molecular biology and evolution* **30**, 772-780.
- 511 **Koch, E. A., Spitzer, R. H., Pithawalla, R. B., Castillos III, F. A. and Parry, D. A.** (1995). Hagfish biopolymer:  
512 a type I/type II homologue of epidermal keratin intermediate filaments. *International journal of biological*  
513 *macromolecules* **17**, 283-292.
- 514 **Koch, E. A., Spitzer, R. H., Pithawalla, R. B. and Parry, D. A.** (1994). An unusual intermediate filament subunit  
515 from the cytoskeletal biopolymer released extracellularly into seawater by the primitive hagfish (*Eptatretus stoutii*).  
516 *Journal of Cell Science* **107**, 3133-3144.
- 517 **Kreplak, L., Bär, H., Leterrier, J. F., Herrmann, H. and Aebi, U.** (2005). Exploring the mechanical behavior of  
518 single intermediate filaments. *Journal of Molecular Biology* **354**, 569-577.
- 519 **Lane, E. B. and Whitear, M.** (1980). Skein cells in lamprey epidermis. *Canadian Journal of Zoology* **58**, 450-455.
- 520 **Lim, J., Fudge, D. S., Levy, N. and Gosline, J. M.** (2006). Hagfish slime ecomechanics: testing the gill-clogging  
521 hypothesis. *Journal of Experimental Biology* **209**, 702-710.
- 522 **McCord, C. L., Whiteley, E., Liang, J., Trejo, C., Caputo, R., Itehua, E., Hasan, H., Hernandez, S.,**  
523 **Jagnandan, K. and Fudge, D.** (2020). Concentration effects of three common fish anesthetics on Pacific hagfish  
524 (*Eptatretus stoutii*). *Fish Physiology and Biochemistry* **46**, 931-943.
- 525 **Mincarone, M. M., Plachetzki, D., McCord, C. L., Winegard, T. M., Fernholm, B., Gonzalez, C. J. and Fudge,**  
526 **D. S.** (2021). Review of the hagfishes (Myxinidae) from the Galapagos Islands, with descriptions of four new  
527 species and their phylogenetic relationships. *Zoological Journal of the Linnean Society*.
- 528 **Miyashita, T.** (2020). A Paleozoic stem hagfish *Myxinikela siroka*—revised anatomy and implications for evolution  
529 of the living jawless vertebrate lineages. *Canadian Journal of Zoology* **98**, 850-865.
- 530 **Nakai, Y., Kubota, S., Goto, Y., Ishibashi, T., Davison, W. and Kohno, S. -I.** (1995). Chromosome elimination  
531 in three Baltic, south Pacific and north-east Pacific hagfish species. *Chromosome Research* **3**, 321-330.
- 532 **Nguyen, L. -T., Schmidt, H. A., Von Haeseler, A. and Minh, B. Q.** (2015). IQ-TREE: a fast and effective  
533 stochastic algorithm for estimating maximum-likelihood phylogenies. *Molecular Biology and Evolution* **32**, 268-  
534 274.
- 535 **O'Brien, F. J.** (2011). Biomaterials & scaffolds for tissue engineering. *Materials today* **14**, 88-95.
- 536 **Olson, J. A.** (2001). The motion of fibres in turbulent flow, stochastic simulation of isotropic homogeneous  
537 turbulence. *International Journal of Multiphase Flow* **27**, 2083-2103.
- 538 **Pan, N., He, J. -H. and Yu, J.** (2007). Fibrous materials as soft matter. *Textile research journal* **77**, 205-213.
- 539 **Pandey, S., Stockwell, C. A., Snider, M. R. and Wisenden, B. D.** (2021). Epidermal club cells in fishes: A case  
540 for ecoimmunological analysis. *International Journal of Molecular Sciences* **22**, 1440.
- 541 **Patro, R., Duggal, G., Love, M. I., Irizarry, R. A. and Kingsford, C.** (2017). Salmon provides fast and bias-  
542 aware quantification of transcript expression. *Nat. Methods* **14**, 417-419.
- 543 **Patzner, R. A., Hanson, V. and Adam, H.** (1982). Fine structure of the surface of small mucous cells in the  
544 epidermis of the hagfish *Myxine glutinosa* (Cyclostomata). *Acta Zoologica* **63**, 183-186.

- 545 **Pfeiffer, W. and Pletcher, T. F.** (1964). Club cells and granular cells in the skin of lamprey. *Journal of the*  
546 *Fisheries Board of Canada* **21**, 1083-1088.
- 547 **R Core Team.** (2013). R: A language and environment for statistical computing (R Foundation for Statistical  
548 Computing).
- 549 **Randle, E. and Sansom, R. S.** (2019). Bite marks and predation of fossil jawless fish during the rise of jawed  
550 vertebrates. *Proceedings of the Royal Society B* **286**, 20191596.
- 551 **Robinson, M. D., McCarthy, D. J. and Smyth, G. K.** (2010). edgeR: a Bioconductor package for differential  
552 expression analysis of digital gene expression data. *Bioinformatics* **26**, 139-140.
- 553 **Rueden, C. T., Schindelin, J., Hiner, M. C., DeZonia, B. E., Walter, A. E., Arena, E. T. and Eliceiri, K. W.**  
554 (2017). ImageJ2: ImageJ for the next generation of scientific image data. *BMC Bioinformatics* **18**, 1-26.
- 555 **Schaffeld, M. and Schultess, J.** (2006). Genes coding for intermediate filament proteins closely related to the  
556 hagfish “thread keratins (TK)”  $\alpha$  and  $\gamma$  also exist in lamprey, teleosts and amphibians. *Experimental Cell Research*  
557 **312**, 1447-1462.
- 558 **Schorno, S., Gillis, T. E. and Fudge, D. S.** (2018). Cellular mechanisms of slime gland refilling in Pacific hagfish  
559 (*Eptatretus stoutii*). *Journal of Experimental Biology* **221**, jeb183806.
- 560 **Schreiner, K. E.** (1916). Zur Kenntnis der Zellgranula. *Archiv für mikroskopische Anatomie* **89**, 79-188.
- 561 **Spitzer, R. H., Koch, E. A. and Downing, S. W.** (1988). Maturation of hagfish gland thread cells: composition and  
562 characterization of intermediate filament polypeptides. *Cell motility and the cytoskeleton* **11**, 31-45.
- 563 **Spitzer, R. H. and Koch, E. A.** (1998). Hagfish skin and slime glands. In *The biology of hagfishes*, pp. 109-132.  
564 Springer.
- 565 **Subramanian, S., Ross, N. W. and MacKinnon, S. L.** (2009). Myxinidin, a novel antimicrobial peptide from the  
566 epidermal mucus of hagfish, *Myxine glutinosa* L. *Marine biotechnology* **11**, 748-757.
- 567 **Terakado, K., Ogawa, M., Hashimoto, Y. and Matsuzaki, H.** (1975). Ultrastructure of the thread cells in the  
568 slime gland of Japanese hagfishes, *Paramyxine atami* and *Eptatretus burgeri*. *Cell and tissue research* **159**, 311-323.
- 569 **Winegard, T., Herr, J., Mena, C., Lee, B., Dinov, I., Bird, D., Bernards, M., Hobel, S., Van Valkenburgh, B.**  
570 **and Toga, A.** (2014). Coiling and maturation of a high-performance fibre in hagfish slime gland thread cells. *Nature*  
571 *Communications* **5**, 1-5.
- 572 **Winegard, T. M. and Fudge, D. S.** (2010). Deployment of hagfish slime thread skeins requires the transmission of  
573 mixing forces via mucin strands. *Journal of Experimental Biology* **213**, 1235-1240.
- 574 **Zeng, Y., Petrichko, S., Nieders, K., Plachetzki, D. and Fudge, D.** (2021). Evolution of a remarkable intracellular  
575 polymer and extreme cell allometry in hagfishes. *Current Biology* **31**, 5062-5068.
- 576 **Zintzen, V., Roberts, C. D., Anderson, M. J., Stewart, A. L., Struthers, C. D. and Harvey, E. S.** (2011). Hagfish  
577 predatory behaviour and slime defence mechanism. *Scientific Reports* **1**, 131.

578

579

Main Figures

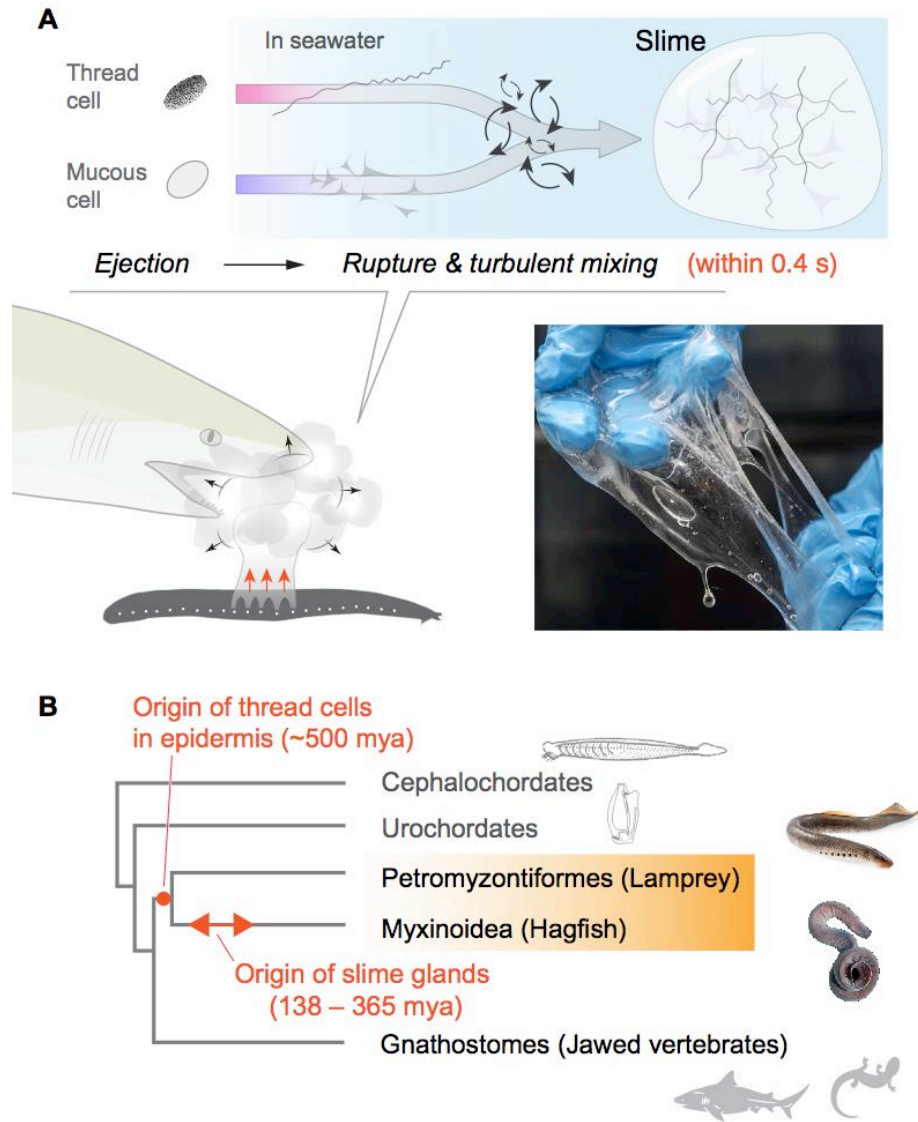

**Figure 1. Mechanism and evolutionary history of hagfish slime.**

(A) Hagfish defensive slime is produced by rapid ejection and rupture of mucous cells and thread cells into seawater by slime glands. Top shows a schematic sequence of slime formation. Threads and mucus are released from ruptured cells and mix with seawater to form large volumes of dilute, soft, viscoelastic slime (lower right). (B) A simplified cladogram of chordates annotated with the origin of hagfish slime gland and the presence of epidermal thread cells (orange shade). Fossil evidence suggests hagfish slime glands evolved between 138 – 365 million years ago (mya; Miyashita, 2020). Thread-producing epidermal cells are found in only hagfishes and lampreys. This suggests a single origin of epidermal thread cells in their common ancestor (Cyclostomi), which dated to ~500 mya and likely preceded the hagfish slime glands.



Main Figures

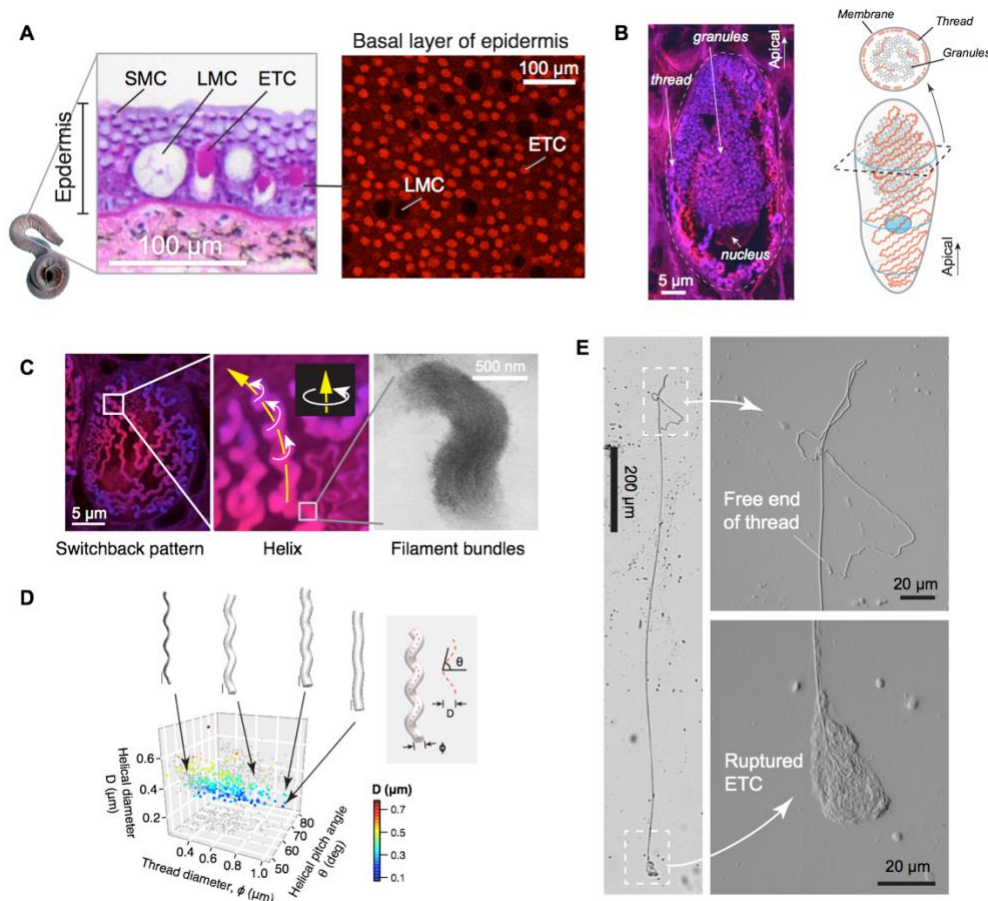

**Figure 2. Hagfish epidermal threads.**

(A) Cross-section of dorsal epidermis from a Pacific Hagfish (*Eptatretus stoutii*; hematoxylin-eosin stained).

(Right) The basal layer of epidermis containing epidermal thread cells (ETCs) and large mucus cells (LMCs), as captured with confocal microscopy in *en face* view. ETCs are characterized by granules and threads stained with the fluorescent stain eosin; LMCs appear as circular voids.

(B) Longitudinal cross-section of an ETC, showing a cluster of granules, the nucleus located at the basal region of the granules, and a helical thread located mainly along the inner surface of the plasma membrane. (Right) Schematic of major cellular components of an ETC.

(C) Three levels of epidermal thread structure. (Left - Middle) At the micro-scale, the thread traces a right-handed helix, the centerline of which is arranged in a switchback pattern on the inner surface of the cell membrane.

Yellow arrow denotes the direction of increase; white arrows denote direction of helical rotation. (Right) At the nano-scale, a thread consists of a dense bundle of intermediate filament proteins, shown here in TEM (see also SI

**Fig. S3D**).

(D) Variations in thread geometry with respect to a morpho-space defined by thread diameter  $\phi$ , helical pitch angle  $\theta$  and helical diameter  $D$ . With increasing pitch angle  $\theta$ , thread diameter  $\phi$  increases ( $P < 0.05$ ; linear regression model) and helical diameter  $D$  decreases ( $P < 0.001$ ), illustrated with idealized threads (scale bars, 1  $\mu\text{m}$ ).

(E) A partially released thread ( $\sim 2$  mm long) from a ruptured ETC, as viewed under light microscopy (see also SI **Fig. S3A**).

Main Figures

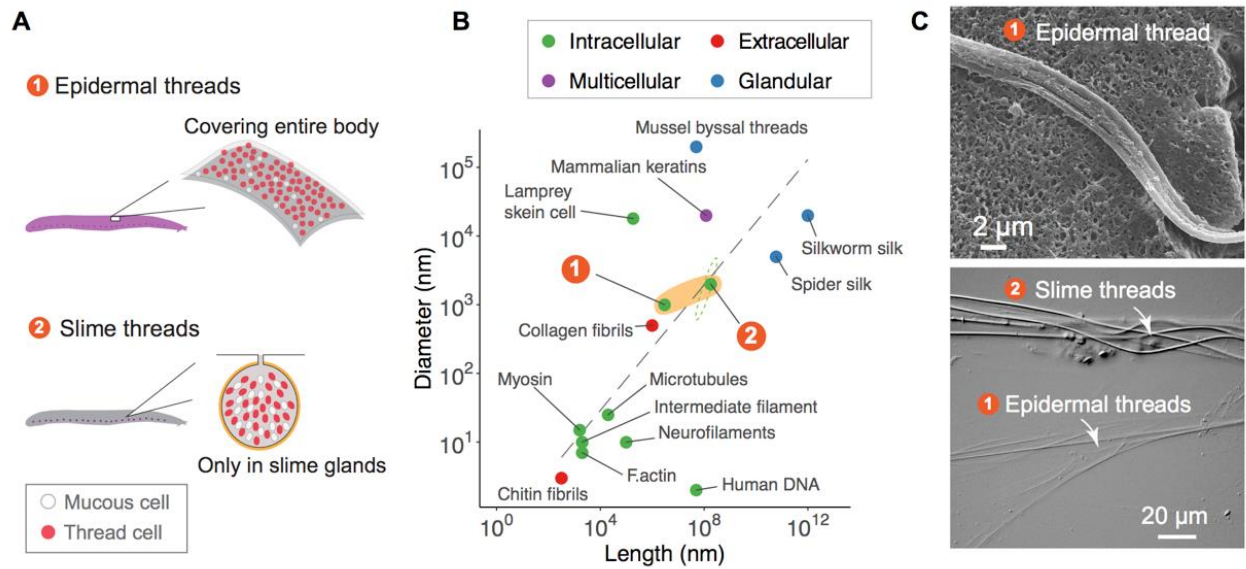

**Figure 3. Comparison of distribution, size and shape between epidermal and slime threads.**

(A) A comparison of distribution between epidermal and slime threads. Note both types of thread cells are accompanied by corresponding mucous cells in epidermis or slime glands. See **SI Fig. S1** for detailed analyses on epidermal cell abundance.

(B) A size comparison of hagfish's epidermal and slime threads (highlighted by orange shading) with other biofibers. The dashed ellipse near slime threads represents the full range of size variation in 19 hagfish species (length  $\sim 5$  cm to  $\sim 22$  cm; maximum diameter  $\sim 0.7$   $\mu\text{m}$  to  $\sim 3.9$   $\mu\text{m}$ ). Trend line represents a linear regression model based on all data points excluding human DNA. Colors denote different fiber production mechanisms (see Zeng et al., 2021).

(C) (Top) A section of an epidermal thread that has appeared to cleave into multiple sub-threads after being stretched, imaged with scanning electron microscopy (see also **SI Fig. S3C**). (Bottom) Two types of threads collected from the same hagfish (viewed with differential interference contrast microscopy), highlighting their difference in diameter.

Main Figures

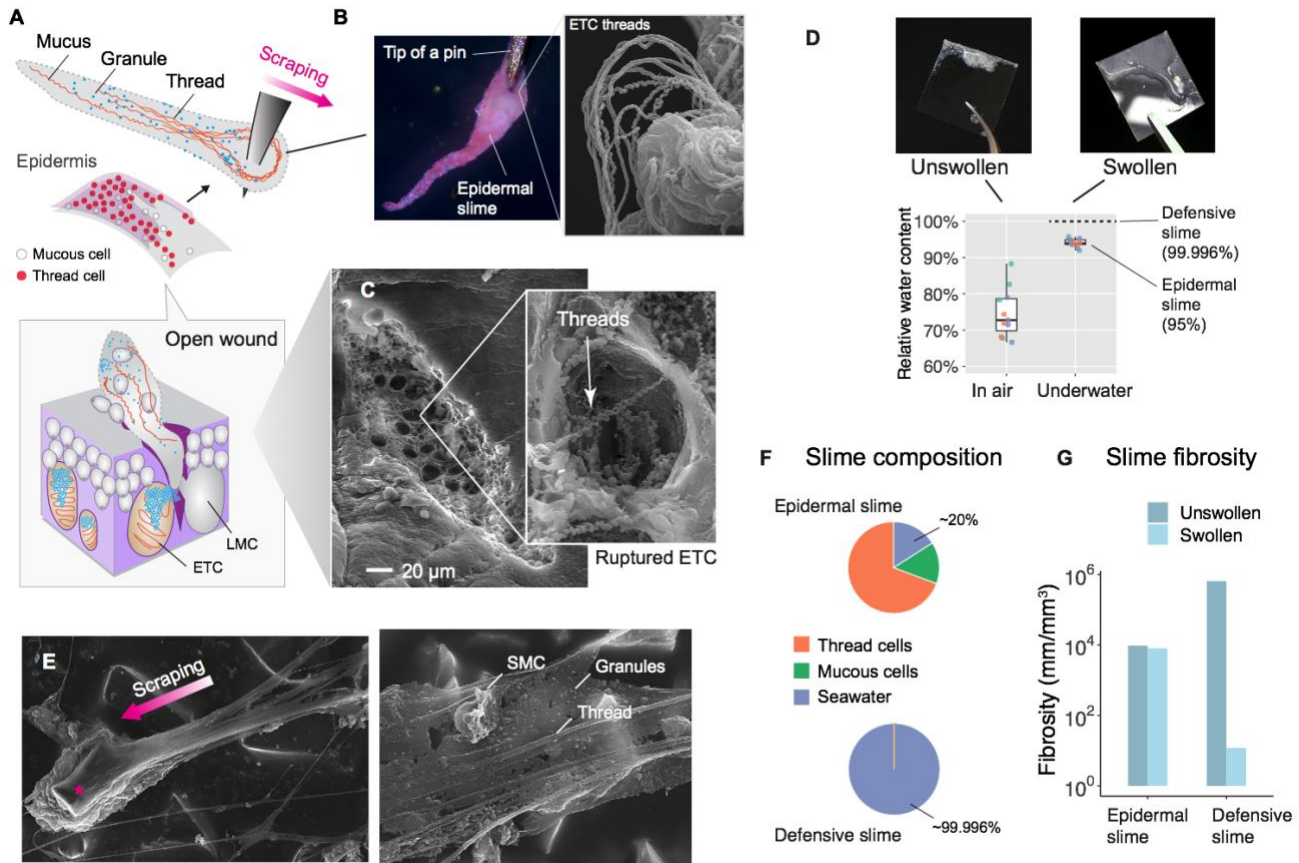

**Figure 4. Formation and structure of epidermal slime produced by wounded skin.**

(A) Schematic of epidermal slime formation when epidermis is wounded, with threads and granules from ruptured ETCs mixing with mucus from ruptured LMCs. Bottom shows a schematic of the slime formation by mixing of cellular contents from an open wound on epidermis. (B) Epidermal slime on pin tip, stained with eosin to show threads. (Right) SEM image of epidermal slime on pin tip, with enlarged areas showing stretched and unstretched threads. (C) SEM images of a shallow abrasion wound, with insets showing damaged ETCs with partially released threads and granules.

(D) The relative water content of epidermal slime collected by scraping a glass coverslip over blotted skin (unswollen) and underwater (swollen). Dots represent individual samples; colors represent different animals ( $N = 3$  for each group; see **Methods**). See **SI Fig. S3-S5** for more information on epidermal threads and epidermal slime.

(E) (Left) Epidermal slime collected on sandpaper. Note the slime accumulated at the leading edge of the sand grain and the elongated slime at the trailing edge. (Right) Thin film of epidermal slime collected by scraping with sandpaper, showing the scaffolding of mucus by threads, and the alignment of threads with the scraping direction.

(F)-(G) A comparison of slime composition (in relative volumes) and fibrosity between epidermal and defensive slimes. Note the high water content and low fibrosity of defensive slime produced with turbulent mixing after active ejection. See **SI Table S2** for details.



Main Figures

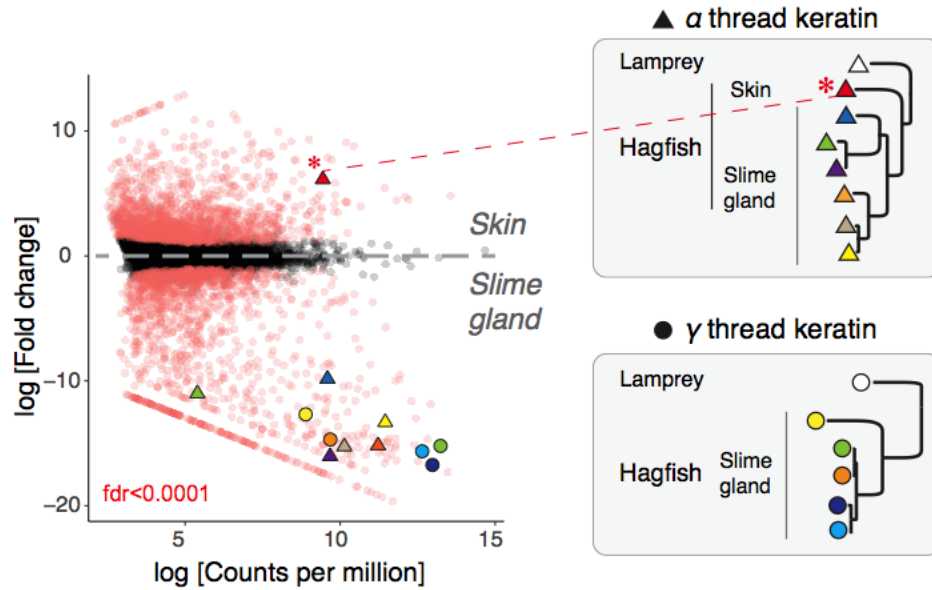

**Figure 5. Molecular analyses suggest an epidermal origin of hagfish defensive slime.**

(Left) Differentially expressed (DE) transcripts (red) from skin vs. slime gland RNAseq read datasets (3× replicates each, single *E. goslinei* specimen; FDR < 0.001). A single  $\alpha$  thread biopolymer gene is expressed in skin, while a diversity of both  $\alpha$  and  $\gamma$  thread biopolymer genes are expressed in slime gland. (Right) Comparative phylogenomic analyses of  $\alpha$  and  $\gamma$  thread gene trees (Maximum likelihood) identified slime gland- and hagfish-specific expansions of both  $\alpha$  and  $\gamma$  intermediate filament genes. The presence of well characterized, skin-specific  $\alpha$  thread orthologs from both lamprey and teleosts indicates that a gene duplication of a skin-expressed  $\alpha$  locus gave rise to a radiation of slime gland-specific  $\alpha$  transcripts. See **SI Fig. S6** for details.

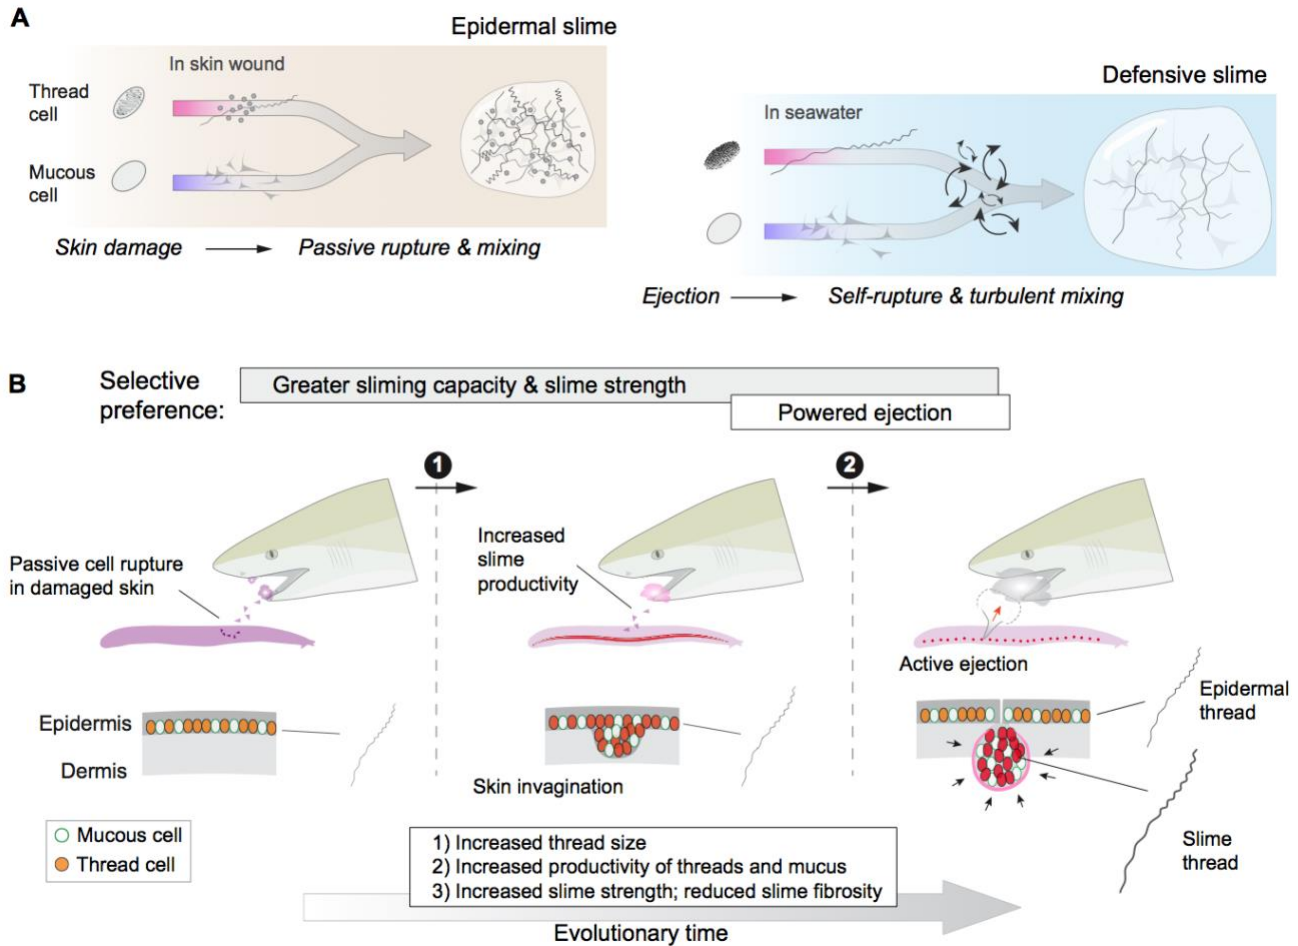

**Figure 6. An epidermal origin of hagfish slime.**

(A) A comparison of slime formation mechanism between epidermal and defensive slimes, highlighting their similarity in basic structural components and differences in mixing mechanism. Note a transition from passive slime formation to active ejection, as well as a transition in slime composition.

(B) Schematic of two critical transitions in the evolution of hagfish slime glands. Specifically, selection for greater slime capacity likely drove an increase in the concentration of thread cells and mucous cells in epidermis and later in slime glands, while selection for active ejection likely was responsible for the acquisition of gland musculature and an enlarged gland cavity with a narrow pore (see **Discussion**). Bottom row highlights the invagination of epidermis (middle) as a possible intermediate state between the ancestral form (left) and muscularized slime glands seen in modern hagfishes (right).

**A**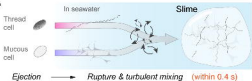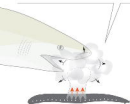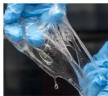**B**

Origin of thread cells  
in epidermis (~500 mya)

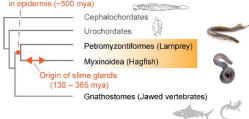

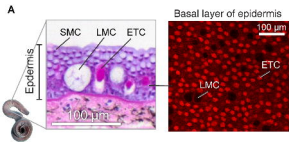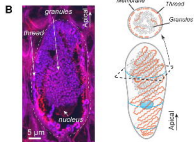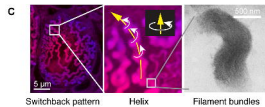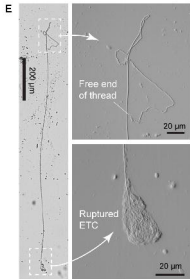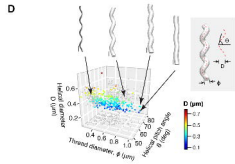

**A****1** Epidermal threads

Covering entire body

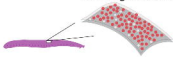**2** Slime threads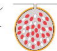

Only in slime glands

- Mucous cell
- Thread cell

**B**

- Intracellular
- Extracellular
- Multicellular
- Glandular

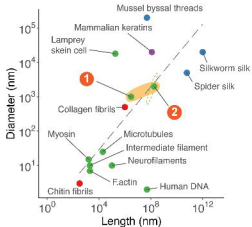**C**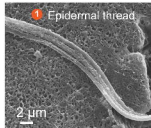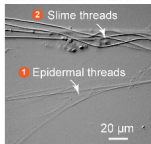

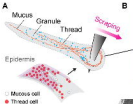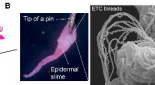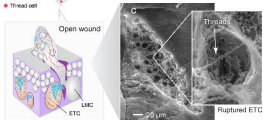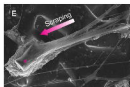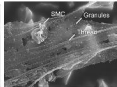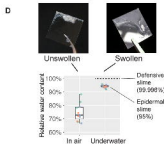

**F Slime composition**

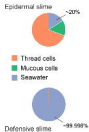

**G Slime fibrosity**

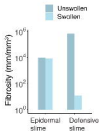

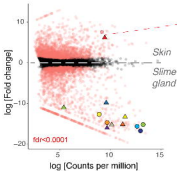

▲  $\alpha$  thread keratin

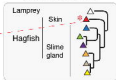

●  $\gamma$  thread keratin

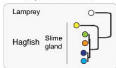

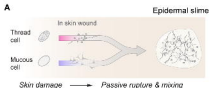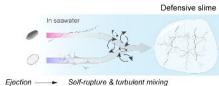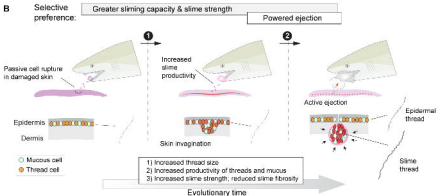

Source: https://www.biorxiv.org/content/10.1101/2022.07.06.499062v1.full.pdf
